# Supplementary figures and images for: Doping Ag2S quantum dots with Pb yields significantly enhanced in vivo fluorescence imaging in the NIR-II window and comparable toxic effects
Source: Royal Society of Chemistry journal article supplement (doi:10.1039/d3nj01870a), 2023-01-01

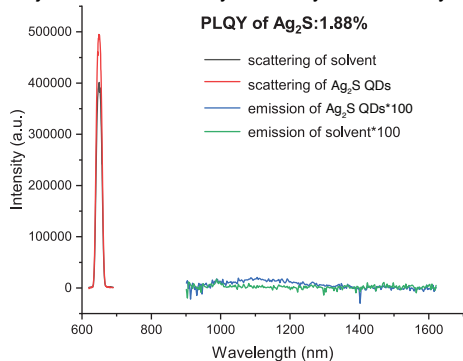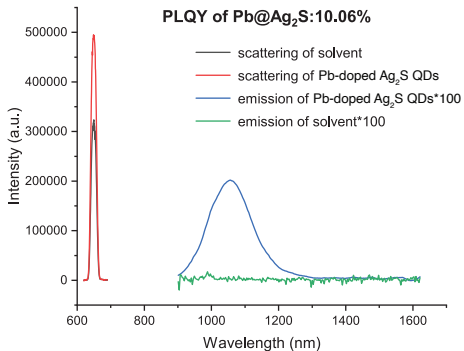

Supplement: d3nj01870a1.pdf [file d3nj01870a1.pdf]

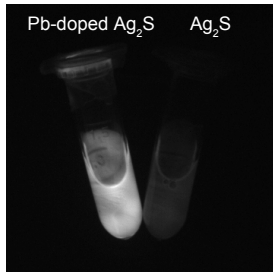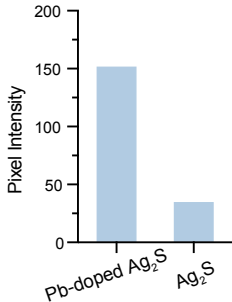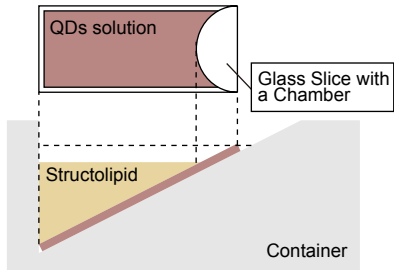

Supplement: d3nj01870a2.pdf [file d3nj01870a2.pdf]

A

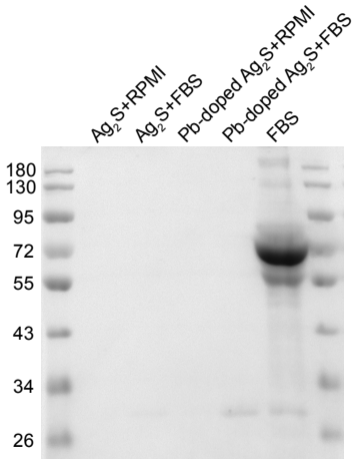

B

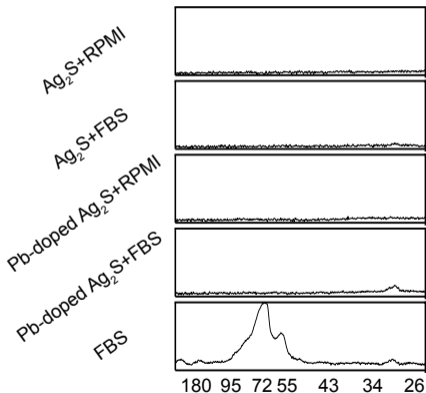

Supplement: d3nj01870a3.pdf [file d3nj01870a3.pdf]

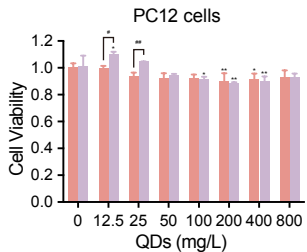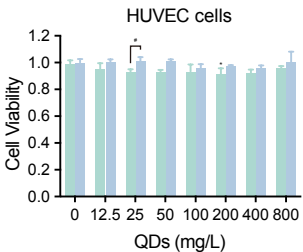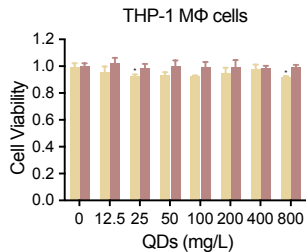

96 h

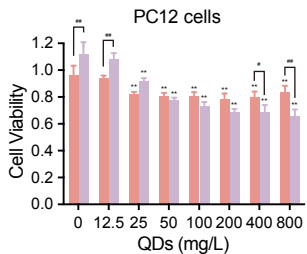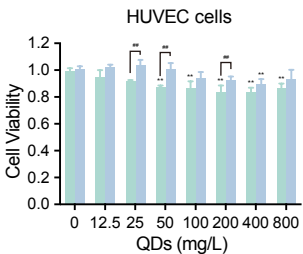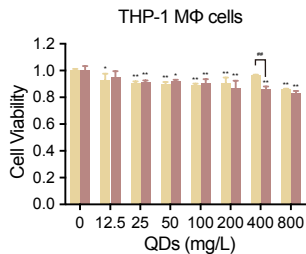

Supplement: d3nj01870a4.pdf [file d3nj01870a4.pdf]
